# Supplementary material for: Kinetic Control Concept for the Diffusion Processes of Paracetamol Active Molecules Across Affinity Polymer Membranes
Source: Research Square preprint supplement (doi:10.21203/rs.3.rs-418338/v1), 2021-04-26
Supplement: Supplementary file 2 [file 7728bb9303790da9aadf9c30.docx]

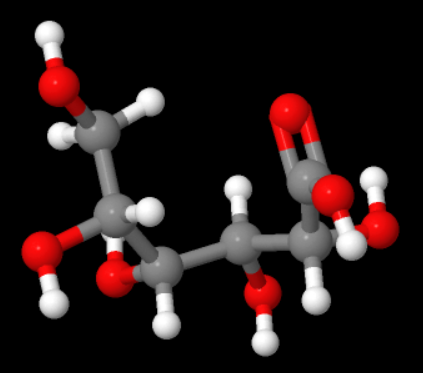


**Figure S1. Structure of gluconic acid**


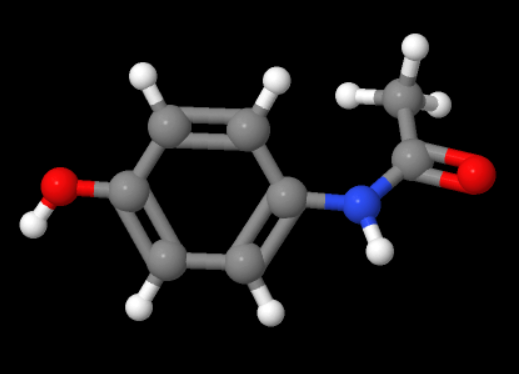


**Figure S2. 1-hydroxy-4-acetaminobenzene (paracetamol)**

**
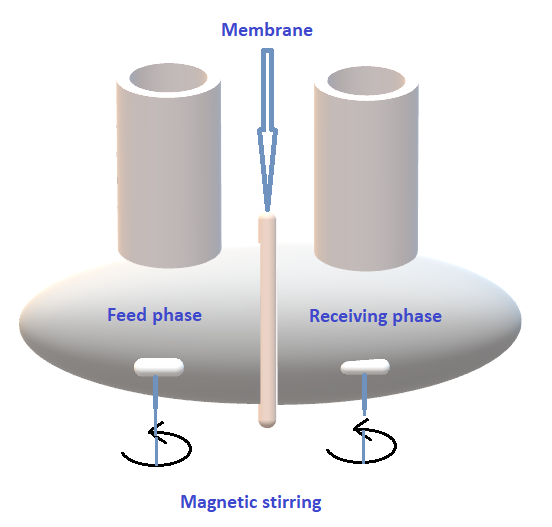
**

**Figure S3. Representation of the facilitated extraction cell**

**
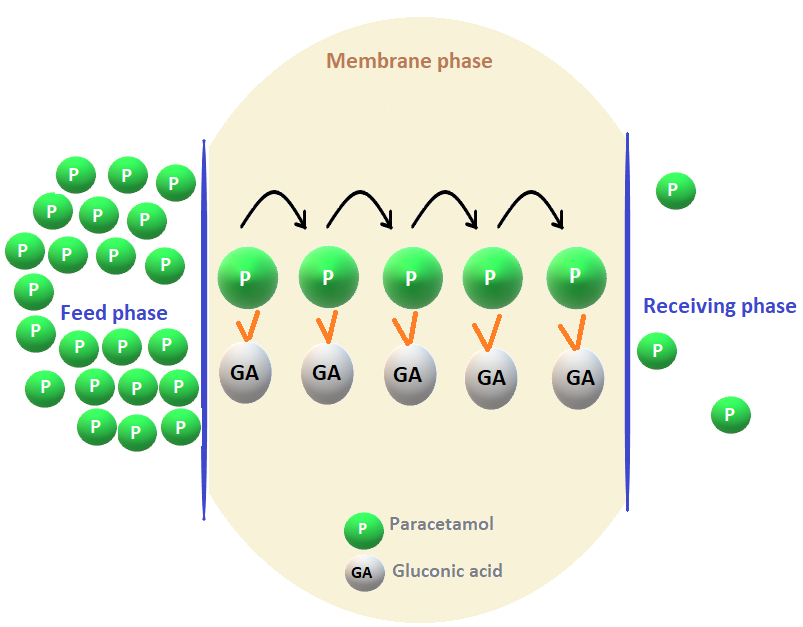
**

**Figure S4. Mechanism of successive jumps on fixed sites during the facilitated extraction process followed for extracting paracetamol through the PIM-GA membrane**

**
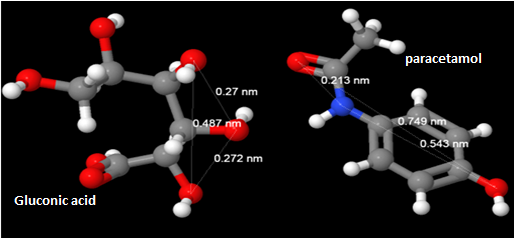
**

**Figure S5. Possible interaction sites between paracetamol and gluconic acid**

**
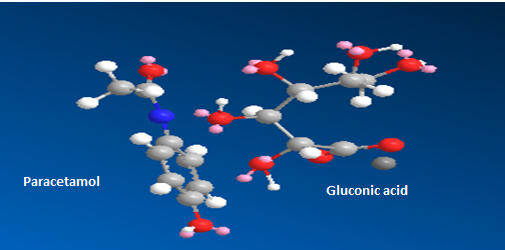
**

**Figure S6. Interaction sites between paracetamol and gluconic acid (Chemdrew)**
